# Supplementary material for: Development of a homogeneous time-resolved FRET (HTRF) assay for the quantification of Shiga toxin 2 produced by E. coli
Source: PeerJ journal article supplement (doi:10.7717/peerj.11871), 2021-07-28
Supplement: SupplementalTable1_Stx2-HTRF.pdf [file SupplementalTable1_Stx2-HTRF.pdf]

Table S1. The detection limit of Stx2a and the comparison of signal intensities obtained by two series of experiments using different ranges of toxin concentration (three independent measurements were performed at each toxin concentration in each series of experiment).

|                        | Delta ratio (DR) |      |      |         |     |
|------------------------|------------------|------|------|---------|-----|
|                        | 1st.             | 2nd. | 3rd. | average | SD  |
| Exp.1 (0.25-256 ng/ml) |                  |      |      |         |     |
| 0.25                   | 0.0              | 0.6  | 0.2  | 0.3     | 0.3 |
| 0.5                    | 0.7              | 0.8  | 0.6  | 0.7     | 0.1 |
| 1.0                    | 1.7              | 2.1  | 1.0  | 1.6     | 0.6 |
| 2.0                    | 2.7              | 3.6  | 2.0  | 2.8     | 0.8 |
| 4.0                    | 4.8              | 5.2  | 3.9  | 4.6     | 0.7 |
| 8.0                    | 9.0              | 9.8  | 8.3  | 9.0     | 0.8 |
| 16                     | 17.8             | 17.9 | 16.1 | 17.3    | 1.0 |
| 32                     | 33.4             | 33.1 | 30.0 | 32.2    | 1.9 |
| 64                     | 60.1             | 56.8 | 52.1 | 56.3    | 4.0 |
| 128                    | 91.5             | 81.7 | 76.1 | 83.1    | 7.8 |
| 256                    | 97.9             | 87.1 | 83.2 | 89.4    | 7.6 |
| Exp. 2 (1.0-64 ng/ml)  |                  |      |      |         |     |
| 1.0                    | 2.2              | 2.3  | 1.3  | 1.9     | 0.6 |
| 2.0                    | 4.2              | 4.2  | 3.3  | 3.9     | 0.5 |
| 4.0                    | 7.4              | 6.8  | 6.8  | 7.0     | 0.4 |
| 8.0                    | 13.5             | 14.3 | 14.3 | 14.0    | 0.5 |
| 16                     | 26.5             | 26.9 | 26.2 | 26.5    | 0.3 |
| 32                     | 49.0             | 50.7 | 48.6 | 49.4    | 1.1 |
| 64                     | 87.6             | 86.4 | 86.5 | 86.8    | 0.7 |

The mean value of buffer control was 15.3 (Exp. 1) or 23.0 (Exp. 2).
