# Supplementary material for: Development of a homogeneous time-resolved FRET (HTRF) assay for the quantification of Shiga toxin 2 produced by E. coli
Source: PeerJ journal article supplement (doi:10.7717/peerj.11871), 2021-07-28
Supplement: SupplementalTable2_Stx2-HTRF.pdf [file SupplementalTable2_Stx2-HTRF.pdf]

Table S2. Signal intensities of Stx2e, Stx2f and Stx1a in the HTRF assay.

| Purified Stx<br>(ng/ml) | Delta ratio (DR) |      |      |
|-------------------------|------------------|------|------|
|                         | 1st.             | 2nd. | 3rd. |
| Stx2e                   |                  |      |      |
| 0.25                    | 0.2              | 0.3  | 0.8  |
| 0.5                     | 0.5              | 0.8  | 0.9  |
| 1.0                     | 2.9              | 2.4  | 3.0  |
| Stx2f                   |                  |      |      |
| 320                     | -1.2             | 0.0  | 1.5  |
| 640                     | -0.9             | 0.2  | 1.1  |
| 1280                    | -0.5             | 1.7  | 2.0  |
| Stx1a                   |                  |      |      |
| 320                     | 0.9              | 0.5  | 0.4  |
| 640                     | 0.5              | 1.2  | 0.4  |
| 1280                    | 1.2              | 0.8  | 0.6  |
